# Supplementary material for: Exploring weak intermolecular interactions in thiocyanate-bonded Zn(ii) and Cd(ii) complexes with methylimidazole: crystal structures, Hirshfeld surface analysis and luminescence properties
Source: Royal Society of Chemistry journal article supplement (doi:10.1039/c8ra04452j), 2018-01-01
Supplement: c8ra04452j1.pdf [file c8ra04452j1.pdf]

## Electronic Supplementary Information

### “Exploring weak intermolecular interactions in thiocyanate-bonded Zn(II) and Cd(II) complexes with methylimidazole: Crystal structures, Hirshfeld surface analysis and luminescence properties”

Alejandro Di Santo<sup>1</sup>, Hiram Pérez<sup>2,\*</sup>, Gustavo A. Echeverría<sup>3,+</sup>, Oscar E. Piro<sup>3,+</sup>, Rodrigo A. Iglesias<sup>4,+</sup>, Raúl E. Carbonio<sup>4,+</sup>, Aida Ben Altabef<sup>1,+</sup>, Diego M. Gil<sup>1,+,\*</sup>

**Figure S1, ESI.** A view of intermolecular C-H...S hydrogen bonds (dashed lines) forming  $R_2^2(14)$  dimer sited at a crystallographic inversion centre of compound (**1**) solid. Hydrogen atoms not involved in the hydrogen bonding are omitted for the sake of clarity.

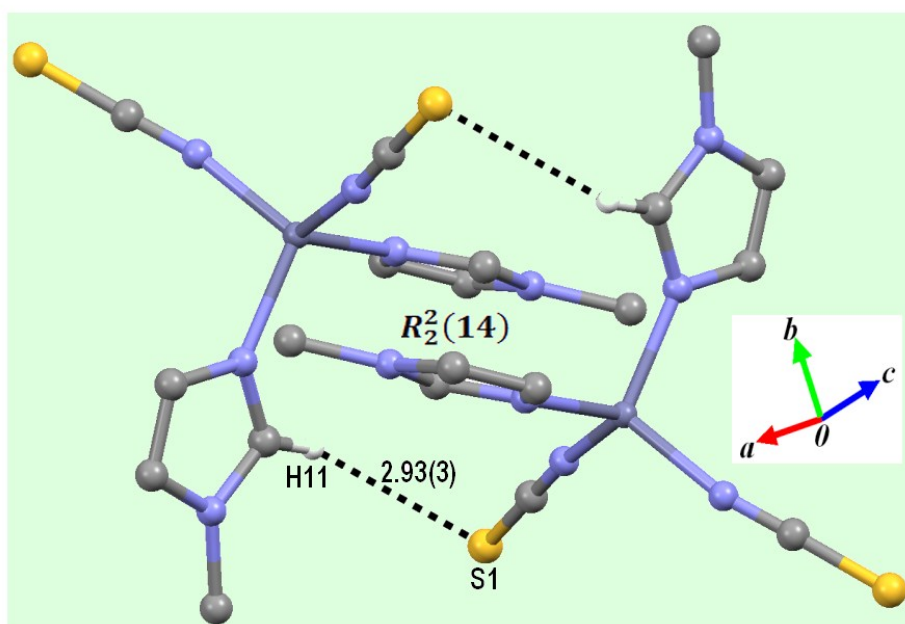

**Figure S2, ESI.** A view of intermolecular N-H...S hydrogen bonds (dashed lines) forming  $R_4^3(26)$  ring motifs for compound (**2**). Hydrogen atoms not involved in the hydrogen bonding are omitted for the sake of clarity.

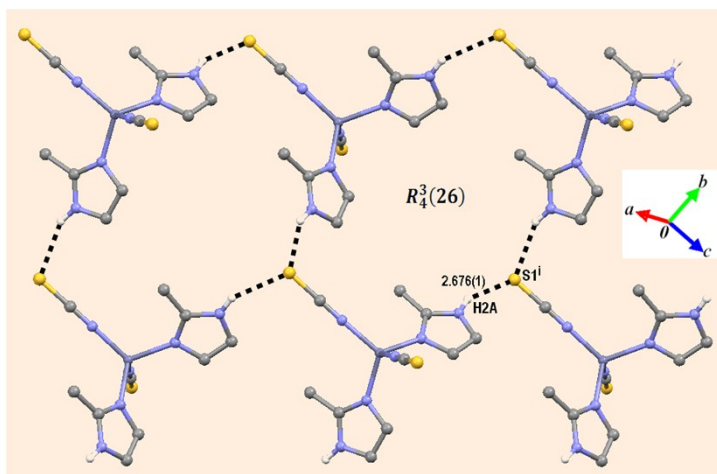

**Figure S3, ESI.** A view of intermolecular C-H...S hydrogen bonds (dashed lines) forming  $R_4^2(20)$  ring motifs for compound (**3**). Hydrogen atoms not involved in the hydrogen bonding are omitted for the sake of clarity.

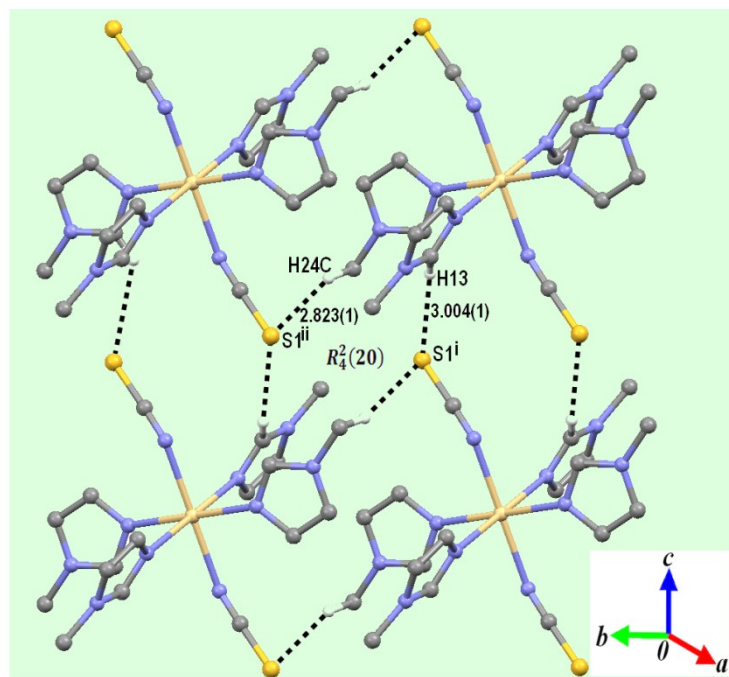

**Figure S4, ESI.** A view of 3D network showing intermolecular C-H...S hydrogen bonds (dashed lines) for polymeric (**4**). Hydrogen atoms not involved in the hydrogen bonding are omitted for the sake of clarity.

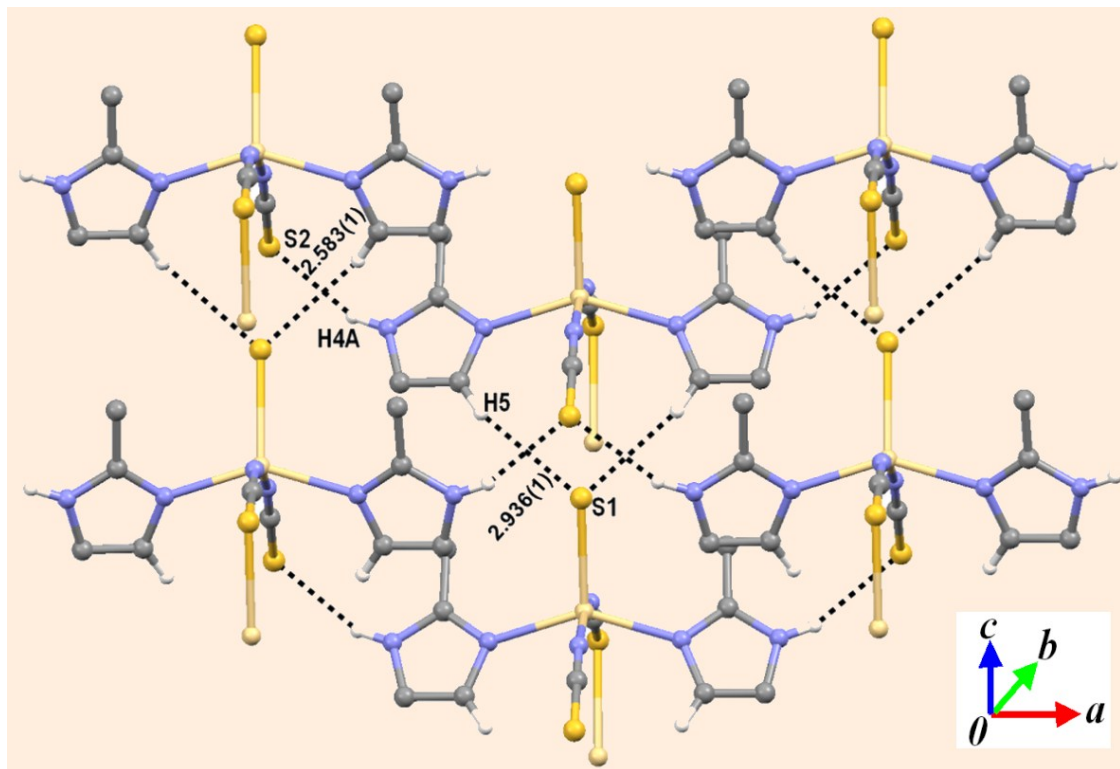

**Figure S5, ESI.** TG and DTA curves for the thermal decomposition of the complex  $[\text{Zn}(\text{1-MeIm})_2(\text{SCN})_2]$  (**1**) at 5 °C/min in air.

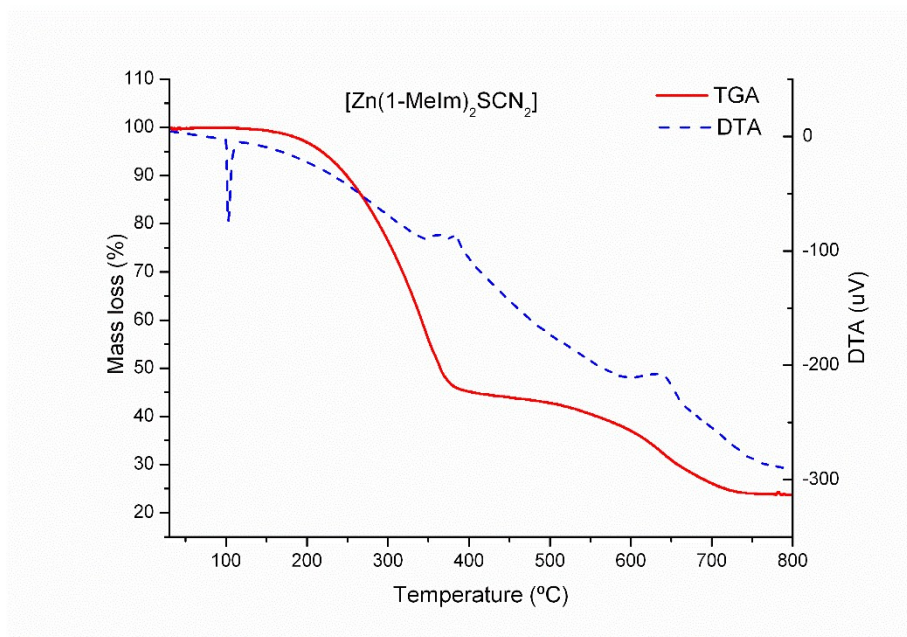

**Figure S6, ESI.** TG and DTA curves for the thermal decomposition of the complex  $[\text{Zn}(\text{2-MeIm})_2(\text{SCN})_2]$  (**2**) at 5 °C/min in air.

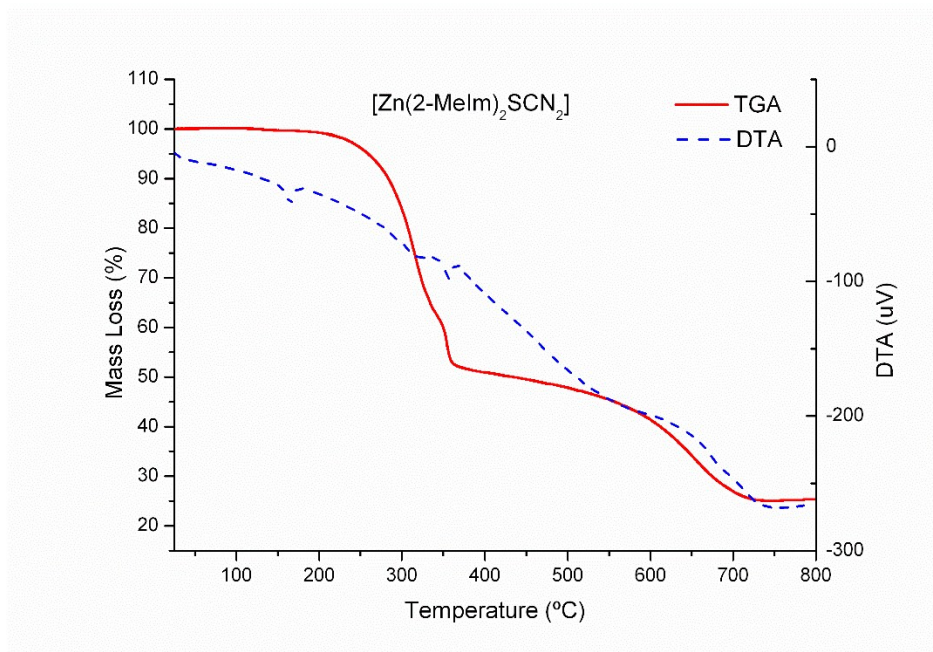



**Figure S7, ESI.** TG and DTA curves for the thermal decomposition of the complex  $[\text{Cd}(\text{1-MeIm})_4(\text{SCN})_2]$  (**3**) at 5 °C/min in air.

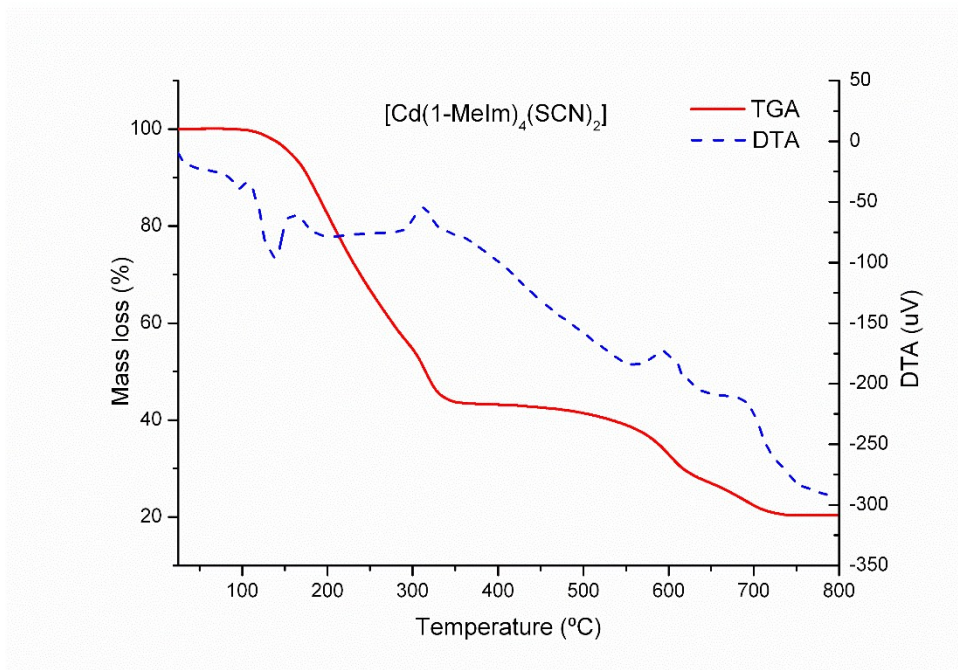

**Figure S8, ESI.** TG and DTA curves for the thermal decomposition of the complex  $[\text{Cd}(\text{2-MeIm})_2(\text{SCN})_2]_n$  (**4**) at 5 °C/min in air.

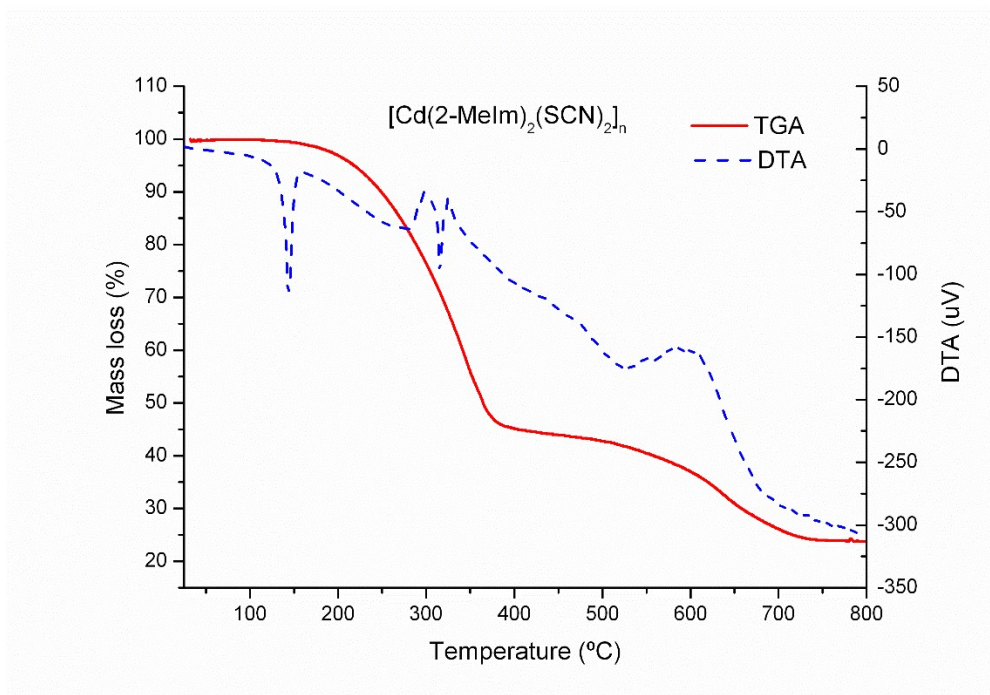

**Figure S9, ESI.** Electronic spectra of the ligands and complexes 1-4 in acetonitrile solutions ( $10^{-3}$  M).

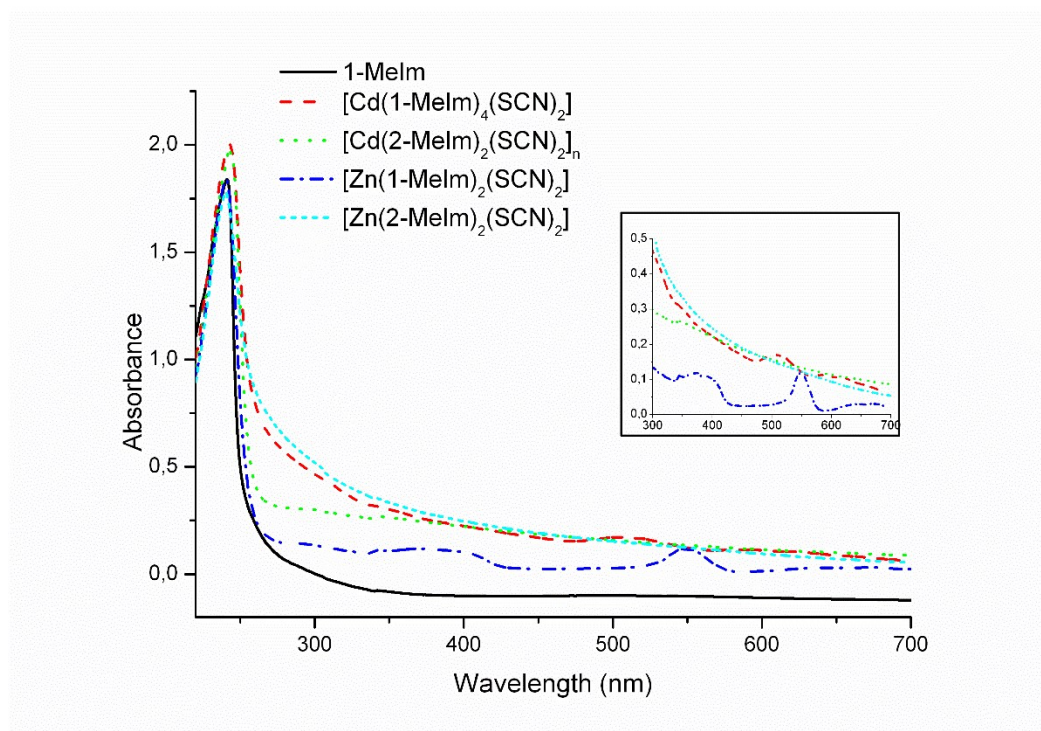

**Figure S10, ESI.** Decay of the photoluminescence intensity integrated over the whole spectral range of 1-Melm, 2-Melm and complexes 1-4.

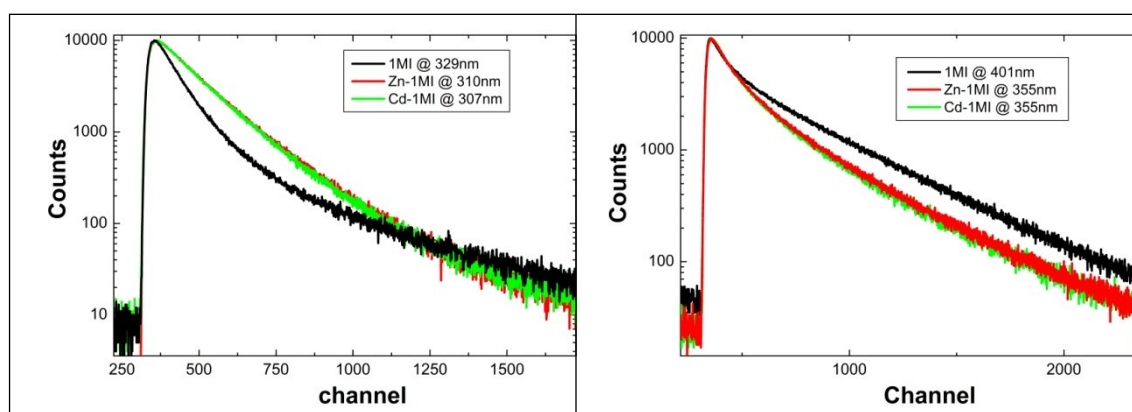

**Table S1, ESI†.** Hirshfeld contact surfaces  $C_{XY}$  (%)\*, proportion of chemical type on the molecular surface  $S_x$  (%) and random contacts  $R_{XY}$  (%) of the main intermolecular interactions for compounds **1-7**.

| Contact $C_{XY}$         | <b>1</b> | <b>2</b> | <b>3</b> | <b>4</b> | <b>5</b> | <b>6</b> | <b>7</b> |
|--------------------------|----------|----------|----------|----------|----------|----------|----------|
| H··H                     | 23.3     | 24.5     | 41.9     | 21.4     | 41.2     | 37.4     | 43.5     |
| C··H                     | 20.7     | 22.2     | 22.8     | 21.2     | 11.0     | 10.9     | 9.7      |
| N··H                     | 13.9     | 12.4     | 11.1     | 16.6     | 7.3      | 9.7      | 8.0      |
| S··H                     | 33.7     | 30.1     | 21.6     | 31.2     | -        | -        | -        |
| O··H                     | -        | -        | -        | -        | -        | 4.6      | -        |
| Cl··H                    | -        | -        | -        | -        | 33.9     | -        | -        |
| Br··H                    | -        | -        | -        | -        | -        | 32.3     | 26.0     |
| C··C                     | -        | 0.5      | 1.0      | 0.0      | 1.3      | 1.6      | 2.0      |
| C··S                     | -        | 3.9      | -        | 4.3      | -        | -        | -        |
| N··S                     | -        | 3.3      | -        | -        | -        | -        | -        |
| Cl··C                    | -        | -        | -        | -        | 1.6      | -        | -        |
| N··C                     | -        | -        | -        | -        | -        | -        | 1.6      |
| Surface $S_x$            |          |          |          |          |          |          |          |
| H                        | 57.6     | 56.9     | 69.7     | 55.9     | 67.9     | 66.3     | 65.4     |
| C                        | 14.4     | 14.0     | 12.7     | 13.4     | 8.2      | 7.9      | 7.6      |
| N                        | 9.0      | 9.8      | 6.3      | 10.2     | 5.0      | 6.5      | 5.5      |
| S                        | 19.0     | 19.0     | 11.3     | 19.3     | -        | -        | -        |
| O                        | -        | -        | -        | -        | -        | 2.4      | -        |
| Cl                       | -        | -        | -        | -        | 18.3     | -        | -        |
| Br                       | -        | -        | -        | -        | -        | 16.7     | 17.7     |
| Random contacts $R_{XY}$ |          |          |          |          |          |          |          |
| H··H                     | 33.2     | 32.4     | 48.5     | 31.3     | 46.0     | 44.0     | 42.8     |
| C··H                     | 16.5     | 16.0     | 17.7     | 15.0     | 11.0     | 10.5     | 9.9      |
| N··H                     | 10.4     | 11.2     | 8.7      | 11.4     | 7.0      | 8.6      | 7.2      |
| S··H                     | 21.9     | 21.6     | 15.7     | 21.5     | -        | -        | -        |
| O··H                     | -        | -        | -        | -        | -        | 3.2      | -        |
| Cl··H                    | -        | -        | -        | -        | 24.8     | -        | -        |
| Br··H                    | -        | -        | -        | -        | -        | 22.1     | 23.2     |
| C··C                     | 2.1      | 2.0      | 1.6      | 1.8      | 0.7      | 0.6      | 0.6      |
| C··S                     | 5.5      | 5.3      | -        | 5.2      | -        | -        | -        |
| N··S                     | -        | 3.7      | -        | -        | -        | -        | -        |
| Cl··C                    | -        | -        | -        | -        | 3.0      | -        | -        |
| N··C                     | 2.6      | -        | -        | -        | -        | -        | 0.8      |

\*Data obtained from CrystalExplorer3.0, including reciprocal contacts.



**Table S2:** IR and Raman bands (in  $\text{cm}^{-1}$ ) for 2-methylimidazole and its Cd(II) and Zn(II) thiocyanate complexes together with their tentative assignment of modes.

| <i>2-methylimidazole</i> |            | <i>[Cd(2-MeIm)<sub>2</sub>(SCN)<sub>2</sub>]<sub>n</sub></i> |            | <i>[Zn(2-MeIm)<sub>2</sub>(SCN)<sub>2</sub>]</i> |            | Assignment                                |
|--------------------------|------------|--------------------------------------------------------------|------------|--------------------------------------------------|------------|-------------------------------------------|
| FT-IR                    | Raman      | FT-IR                                                        | Raman      | FT-IR                                            | Raman      |                                           |
| 3182 (s)                 | -          | 3224 (m)                                                     | -          | 3319 (vs)                                        | -          | $\nu$ NH                                  |
| 3137 (s)                 | 3134 (52)  | 3147 (s)                                                     | 3147(18)   | 3160 (w)                                         | 3160 (26)  | $\nu$ CH                                  |
| 2961 (s)                 | 2960 (23)  | 2954 (vvw)                                                   | -          | 2967 (vvw)                                       | -          | $\nu_a$ CH <sub>3</sub>                   |
| 2926 (s)                 | 2925 (53)  | 2933 (vvw)                                                   | 2934 (29)  | 2934 (vw)                                        | 2934 (36)  | $\nu_s$ CH <sub>3</sub>                   |
| -                        | -          | 2119 (vs)                                                    | 2118 (67)  | 2100 (vs)                                        | 2102 (100) | $\nu$ CN                                  |
| -                        | -          | 2076 (vs)                                                    | 2077 (100) | 2077 (vs)                                        | 2077 (51)  | $\nu$ CN                                  |
| 1597 (s)                 | -          | 1566 (s)                                                     | -          | 1565 (vs)                                        | -          | $\nu$ C-C + $\nu$ C-N                     |
| 1479 (vvw)               | 1479 (100) | 1495 (vw)                                                    | 1497 (49)  | 1500 (m)                                         | 1502 (100) | $\nu$ C-C + $\delta_a$ CH <sub>3</sub>    |
| 1447 (s)                 | -          | 1428 (w)                                                     | -          | 1430 (m)                                         | -          | $\delta_a$ CH <sub>3</sub>                |
| 1371 (w)                 | -          | 1352 (w)                                                     | -          | 1351 (m)                                         | 1353 (16)  | $\delta_s$ CH <sub>3</sub>                |
| 1303 (m)                 | 1303 (4)   | 1280 (s)                                                     | -          | 1279 (w)                                         | 1279 (17)  |                                           |
| 1155 (m)                 | -          | 1159 (w)                                                     | -          | 1157 (m)                                         |            | $\nu$ ring                                |
| 1117 (s)                 | 1113 (79)  | 1098 (w)                                                     | -          | 1140 (s)                                         | 1140 (55)  | $\delta$ CCH                              |
| 1048                     | -          | 1038 (w)                                                     | -          | 1046 (w)                                         | -          | $\rho$ CH <sub>3</sub>                    |
| 995                      | 993 (15)   | 1012 (w)                                                     | -          | 1023 (vw)                                        | -          | $\rho$ CH <sub>3</sub> + $\nu$ C-N (ring) |
| 945 (s)                  | 937 (9)    | 943 (vw)                                                     | -          | 930 (w)                                          | 929 (13)   | $\rho$ CH <sub>3</sub> + $\delta$ CCH     |
| 916 (s)                  | 916 (10)   | 901 (vvw)                                                    | -          | -                                                | -          | $\delta$ ring                             |
| -                        | -          | 770 (w)                                                      | 857 (25)   | 757 (w)                                          | -          | $\nu$ CS                                  |
| -                        | -          | 765 (vvw)                                                    | -          | 747 (w)                                          | -          | $\nu$ CS                                  |
| 683 (s)                  | 682 (39)   | 672 (m)                                                      | 674 (12)   | 666(vw)                                          | 684 (9)    | $\gamma$ CH                               |
| 629                      | 629 (2)    | 624 (vvw)                                                    | -          | 622 (vw)                                         | 620 (6)    | $\gamma$ NH                               |
| -                        | -          | 469 (w)                                                      | -          | 478 (s)                                          | 481 (5)    | $\delta$ SCN                              |
| -                        | -          | 451 (vw)                                                     | -          | 470 (m)                                          | -          | $\delta$ SCN                              |
| -                        | 269 (25)   | -                                                            | 283 (13)   | -                                                | 284 (15)   | G CNCN                                    |
| -                        | -          | -                                                            | -          | -                                                | 254 (9)    | $\nu$ Zn-N(ring)                          |
| -                        | -          | -                                                            | -          | -                                                | 212 (17)   | $\nu$ Zn-N (SCN)                          |
| -                        | -          | -                                                            | 208 (25)   | -                                                | -          | $\nu$ Cd-N (2Au)                          |
| -                        | -          | -                                                            | 185 (12)   | -                                                | -          | $\nu$ Cd-N (NCS)                          |
| -                        | -          | -                                                            | 174 (44)   | -                                                | -          | $\nu$ Cd-N (ring)                         |
| -                        | -          | -                                                            | 145 (49)   | -                                                | -          | $\nu$ Cd-S (B1g)                          |
| -                        | -          | -                                                            | 112 (94)   | -                                                | -          | $\nu$ Cd-N(ring)                          |
| -                        | -          | -                                                            | 107 (96)   | -                                                | -          | $\nu$ Cd-N(SCN)                           |
| -                        | -          | -                                                            | -          | -                                                | 82 (99)    | $\rho$ SCN                                |
| -                        | -          | -                                                            | 75 (99)    | -                                                | 64 (99)    | $\tau$ CH <sub>3</sub>                    |

**Table S3:** IR and Raman bands (in  $\text{cm}^{-1}$ ) for 1-methylimidazole Zn(II) and Cd(II) thiocyanate complex together with their tentative assignment of modes.

| <i>1-Methylimidazole</i> |           | <i>[Cd(1-MeIm)<sub>4</sub>(SCN)<sub>2</sub>]</i> |            | <i>[Zn(1-MeIm)<sub>2</sub>(SCN)<sub>2</sub>]</i> |            | Assignment                              |
|--------------------------|-----------|--------------------------------------------------|------------|--------------------------------------------------|------------|-----------------------------------------|
| FT-IR                    | Raman     | FT-IR                                            | Raman      | FT-IR                                            | Raman      |                                         |
| -                        | 3134 (39) | 3145 (vw)                                        | 3146 (17)  | 3142                                             | 3143 (4)   | $\nu$ CH                                |
| 3127 (vvw)               | -         | 3125(w)                                          | 3127 (13)  | 3120                                             | 3124 (3)   | $\nu$ CH                                |
| 3111(vs)                 | 3109 (35) | 3111 (m)                                         | 3117 (8)   | -                                                | -          | $\nu$ CH                                |
| 2983                     | -         | 2984 (vw)                                        | -          | -                                                | -          | $\nu$ a CH <sub>3</sub>                 |
| 2952 (m)                 | 2955 (36) | 2958 (s)                                         | 2959 (10)  | 2967                                             | 2959 (8)   | $\nu$ a CH <sub>3</sub>                 |
| 2812 (w)                 | 2816 (11) | -                                                | 2815 (2)   | -                                                | -          | $\nu$ s CH <sub>3</sub>                 |
| -                        | -         | 2083 (vs)                                        | -          | 2098                                             | 2086 (100) | $\nu$ C-N                               |
| -                        | -         | 2066 (s)                                         | 2074 (100) | 2083                                             | 2070 (93)  | $\nu$ C-N                               |
| 1669                     | -         | 1671 (vw)                                        | -          | -                                                | -          | $\nu$ C-N + $\delta$ a CH <sub>3</sub>  |
| 1619                     | -         | 1621 (vw)                                        | -          | -                                                | -          | $\nu$ C-C + $\delta$ a CH <sub>3</sub>  |
| 1522 (vs)                | 1519 (15) | 1534 (m)                                         | 1533 (3)   | 1545                                             | 1541 (21)  | $\delta$ a CH <sub>3</sub>              |
| -                        | -         | 1516 (m)                                         | 1518 (3)   | 1525                                             | 1522 (30)  | $\delta$ a CH <sub>3</sub>              |
| 1422                     | 1422 (9)  | 1421 (vw)                                        | 1419 (4)   | 1421                                             | 1414 (20)  | $\nu$ C-N + $\delta$ a CH <sub>3</sub>  |
| -                        | -         | 1413 (vw)                                        | -          | -                                                | -          | $\nu$ C-N + $\delta$ a CH <sub>3</sub>  |
| 1363(m)                  | -         | 1369 (vs)                                        | 1369 (9)   | 1372                                             | 1370 (50)  | $\nu$ ring + $\delta$ a CH <sub>3</sub> |
| 1329                     | 1328 (20) | 1339 (vvw)                                       | 1335 (18)  | 1338                                             | 1336 (66)  | $\nu$ ring + $\delta$ a CH <sub>3</sub> |
| 1288                     | 1288 (21) | 1282 (m)                                         | 1283 (5)   | 1286                                             | 1284 (5)   | $\nu$ ring                              |
| 1237                     | 1238 (9)  | 1237 (s)                                         | 1239 (2)   | 1240                                             | 1242 (10)  | $\nu$ C-N + $\delta$ HCN                |
| 1026 (m)                 | 1032 (33) | 1027 (vw)                                        | 1030 (2)   | 1047                                             | 1041 (3)   | $\rho$ CH <sub>3</sub>                  |
| -                        | -         | 1023 (vw)                                        | -          | 1025                                             | 1024 (66)  | $\rho$ CH <sub>3</sub>                  |
| 925 (vs)                 | -         | 937 (s)                                          | 937 (4)    | 956                                              | 954 (33)   | $\nu$ C-N + $\delta$ CNC                |
| 836 (vs)                 | -         | 838 (s)                                          | 833 (2)    | 828                                              | 837 (77)   | $\gamma$ C-H                            |
| -                        | -         | 769 (m)                                          | -          | 768                                              | 760 (7)    | $\nu$ C-S                               |
|                          |           | 764 (m)                                          | -          | 753                                              | -          | $\nu$ C-S                               |
| 661                      | -         | 670 (w)                                          | 669 (12)   | 673                                              | 670 (65)   | $\gamma$ C-H                            |
| 620 (vs)                 | 619 (3)   | 619 (s)                                          | 622 (2)    | 619                                              | 618 (16)   | $\gamma$ C-H                            |
|                          |           | 473 (w)                                          | 471 (1)    | 478                                              | 477 (6)    | $\delta$ SCN                            |
| -                        | -         | 464 (w)                                          | -          | 473 sh                                           | -          | $\delta$ SCN                            |
| -                        | 355 (7)   | -                                                | 368 (3)    | -                                                | 366 (21)   | $\delta$ N-CH <sub>3</sub>              |
| -                        | -         | -                                                | -          | -                                                | 246 (32)   | $\nu$ Zn-N(ring)                        |
|                          |           |                                                  | -          | -                                                | 214 (31)   | $\nu$ Zn-N (SCN)                        |
| -                        | -         | -                                                | 202 (19)   | -                                                | -          | $\nu$ Cd-N (SCN)                        |
| -                        | -         | -                                                | 142 (40)   | -                                                | -          | $\nu$ Cd-N (ring)                       |
| -                        | -         | -                                                | 87 (56)    | -                                                | 82 (58)    | $\rho$ SCN                              |
| -                        | -         | -                                                | 65 (33)    | -                                                | -          | $\tau$ CH <sub>3</sub>                  |

**Table S4:** Steps for the thermal decomposition of complexes **1-4** and % of mass loss.

| <b>Complex</b> | <b>Steps</b> | <b>Temperature range (°C)</b> | <b>Theoretical mass loss (%)</b> | <b>Observed mass loss (%)</b> |
|----------------|--------------|-------------------------------|----------------------------------|-------------------------------|
| <b>1</b>       | 1            | 200-390                       | 47.5                             | 47.0                          |
|                | 2            | 500-750                       | 28.9                             | 29.0                          |
|                | Total        | -                             | 76.4                             | 76.0                          |
| <b>2</b>       | 1            | 250-375                       | 47.5                             | 48.0                          |
|                | 2            | 500-700                       | 28.9                             | 28.0                          |
|                | Total        | -                             | 76.4                             | 76.0                          |
| <b>3</b>       | 1            | 150-350                       | 58.0                             | 56.4                          |
|                | 2            | 500-750                       | 19.0                             | 23.6                          |
|                | Total        | -                             | 77.0                             | 80.0                          |
| <b>4</b>       | 1            | 200-390                       | 42.0                             | 43.0                          |
|                | 2            | 500-750                       | 25.0                             | 22.0                          |
|                | Total        | -                             | 67.0                             | 65.0                          |
